# Supplementary material
Source: PubMed Central journal article supplement (PMC9362711)
Supplement: 44161_2022_108_MOESM1_ESM.pdf [file 44161_2022_108_MOESM1_ESM.pdf]

---

**Supplementary information**

---

**Gasdermin D-dependent platelet  
pyroptosis exacerbates NET formation and  
inflammation in severe sepsis**

---

In the format provided by the  
authors and unedited

1 **Gasdermin D-dependent platelet pyroptosis exacerbates NET formation and**  
2 **inflammation in severe sepsis**

3 Meiling Su<sup>1,7</sup>, Chaofei Chen<sup>1,2,7</sup>, Shaoying Li<sup>1</sup>, Musheng Li<sup>1</sup>, Zhi Zeng<sup>1</sup>, Yuan Zhang<sup>1</sup>,  
4 Luoxing Xia<sup>1</sup>, Xiuzhen Li<sup>1</sup>, Dezhong Zheng<sup>3</sup>, Qiqi Lin<sup>1</sup>, Xuejiao Fan<sup>1</sup>, Ying Wen<sup>1</sup>,  
5 Yingying Liu<sup>1</sup>, Feiyan Chen<sup>1</sup>, Wei Luo<sup>1</sup>, Yun Bu<sup>1</sup>, Jinhong Qin<sup>1</sup>, Manli Guo<sup>1</sup>,  
6 Miaoyun Qiu<sup>1</sup>, Lei Sun<sup>1</sup>, Renjing Liu<sup>4</sup>, Ping Wang<sup>1,8</sup>, John Hwa<sup>5,8</sup>, Wai Ho Tang<sup>1,6,8</sup> ✉

7 <sup>1</sup>Institute of Pediatrics, Guangzhou Women and Children's Medical Centre,  
8 Guangzhou Medical University, Guangzhou, 510080, China; <sup>2</sup>The Joint Center for  
9 Infection and Immunity, a. Guangzhou Institute of Pediatrics, Guangzhou Women and  
10 Children's Medical Center, Guangzhou, 510623, China; b. Institute Pasteur of  
11 Shanghai, Chinese Academy of Science, Shanghai, 200031, China; <sup>3</sup>Department of  
12 Cardiology, Third Affiliated Hospital of Southern Medical University, Southern  
13 Medical University, 183 Zhongshan Avenue West, Guangzhou, 510630, China. <sup>4</sup>Victor  
14 Chang Cardiac Research Institute, Sydney, Australia; <sup>5</sup>Section of Cardiovascular  
15 Medicine, Department of Internal Medicine, Yale Cardiovascular Research Center,  
16 Yale University School of Medicine, New Haven, 06511, CT, USA; <sup>6</sup>School of  
17 Nursing and Health Studies, Hong Kong Metropolitan University, Ho Man Tin,  
18 Kowloon, Hong Kong SAR, China. <sup>7</sup>These authors contributed equally to this work:  
19 Meiling Su, Chaofei Chen. <sup>8</sup>These authors contributed equally: Ping Wang, John Hwa,  
20 Wai Ho Tang. ✉ e-mail: waiho.tang@gwcmc.org.

21

## Supplementary Tables

22 **Supplementary Table 1: Demographic characteristics and laboratory findings of**23 **the cohort on admission.**

| Variable                           | Total<br>(n = 93) | Sepsis<br>(n = 37) | Severe sepsis   |                | P value |                  |                 |                 |
|------------------------------------|-------------------|--------------------|-----------------|----------------|---------|------------------|-----------------|-----------------|
|                                    |                   |                    | Severe (n = 22) | Shock (n = 34) | Overall | Severe vs Sepsis | Shock vs Sepsis | Shock vs Severe |
| Demographics                       |                   |                    |                 |                |         |                  |                 |                 |
| Age < 1 year                       | 50 (54)           | 20 (54)            | 16 (73)         | 14 (41)        | 0.0689  | -                | -               | -               |
| Age 1~5 years                      | 32 (34)           | 16 (43)            | 4 (18)          | 12 (35)        | 0.1453  | -                | -               | -               |
| Age 5~12 years                     | 9 (10)            | 1 (3)              | 1 (5)           | 7 (21)         | 0.0349  | >0.9999          | 0.0721          | 0.1948          |
| Age 12~18 years                    | 2 (2)             | 0 (0)              | 1 (5)           | 1 (3)          | 0.4691  | -                | -               | -               |
| Gender male, n (%)                 | 53 (57)           | 25 (68)            | 12 (55)         | 16 (47)        | 0.2111  | -                | -               | -               |
| Medications                        |                   |                    |                 |                |         |                  |                 |                 |
| Cephalosporin antibiotics, n (%)   | 32 (34)           | 17 (46)            | 7 (32)          | 8 (24)         | 0.1333  | -                | -               | -               |
| Vancomycin antibiotics, n (%)      | 16 (17)           | 1 (3)              | 4 (18)          | 11 (32)        | 0.0017  | 0.0593           | 0.0010          | 0.3562          |
| Penicillin antibiotics, n (%)      | 15 (16)           | 6 (16)             | 5 (23)          | 4 (12)         | 0.5567  | -                | -               | -               |
| Typical Symptoms                   |                   |                    |                 |                |         |                  |                 |                 |
| Fever, n (%)                       | 80 (86)           | 36 (97)            | 17 (68)         | 27 (79)        | 0.0192  | 0.0360           | 0.0360          | >0.9999         |
| Dyspnea, n (%)                     | 56 (60)           | 0 (0)              | 22 (100)        | 34 (100)       | <0.0001 | <0.0001          | <0.0001         | >0.9999         |
| Primary source of infection, n (%) |                   |                    |                 |                |         |                  |                 |                 |
| Respiratory tract                  | 61 (66)           | 12 (32)            | 22 (100)        | 27 (79)        | <0.0001 | <0.0001          | 0.0003          | 0.0627          |
| Abdomen                            | 14 (15)           | 9 (24)             | 2 (9)           | 3 (9)          | 0.1556  | -                | -               | -               |
| Skin                               | 14 (15)           | 7 (19)             | 0 (0)           | 7 (21)         | 0.0528  | -                | -               | -               |
| Cardiovascular                     | 10 (11)           | 3 (8)              | 0 (0)           | 7 (21)         | 0.0366  | 0.2860           | 0.2670          | 0.1050          |

|                                   |                 |                 |                 |                 |         |         |         |         |
|-----------------------------------|-----------------|-----------------|-----------------|-----------------|---------|---------|---------|---------|
| Urinary tract                     | 7 (8)           | 5 (14)          | 0 (0)           | 2 (6)           | 0.1804  | -       | -       | -       |
| Hematologic and inflammatory data |                 |                 |                 |                 |         |         |         |         |
| WBC ( $10^9/L$ )                  | 15.04 ± 11.07   | 19.87 ± 11.72   | 12.59 ± 9.81    | 11.25 ± 9.20    | 0.0023  | 0.0383  | 0.0034  | >0.9999 |
| Lymphocyte ( $10^9/L$ )           | 3.82 ± 4.62     | 5.19 ± 5.99     | 3.53 ± 3.45     | 2.47 ± 2.91     | 0.0004  | 0.1228  | 0.0003  | 0.4718  |
| PMNs ( $10^9/L$ )                 | 8.91 ± 8.00     | 12.51 ± 8.54    | 7.06 ± 8.12     | 6.12 ± 5.59     | 0.0009  | 0.0113  | 0.0023  | >0.9999 |
| Monocyte ( $10^9/L$ )             | 1.41 ± 1.31     | 1.88 ± 1.41     | 1.15 ± 0.81     | 1.05 ± 1.34     | 0.0004  | 0.0904  | 0.0002  | 0.5715  |
| Eosinophil ( $10^9/L$ )           | 0.24 ± 0.68     | 0.16 ± 0.25     | 0.58 ± 1.28     | 0.11 ± 0.24     | 0.0036  | 0.9984  | 0.0364  | 0.0053  |
| Basophil ( $10^9/L$ )             | 0.04 ± 0.10     | 0.04 ± 0.04     | 0.04 ± 0.05     | 0.03 ± 0.06     | 0.0139  | >0.9999 | 0.0571  | 0.0255  |
| N (%)                             | 52.99 ± 19.75   | 55.73 ± 17.76   | 50.18 ± 20.97   | 51.82 ± 21.17   | 0.3938  | -       | -       | -       |
| L (%)                             | 28.23 ± 18.09   | 27.38 ± 14.47   | 31.36 ± 19.15   | 27.12 ± 21.02   | 0.4530  | -       | -       | -       |
| RBC ( $10^9/L$ )                  | 3.59 ± 0.81     | 3.98 ± 0.64     | 3.51 ± 0.79     | 3.21 ± 0.81     | 0.0001  | 0.0546  | <0.0001 | 0.2881  |
| HGB (g/L)                         | 102.59 ± 26.02  | 111.22 ± 19.98  | 107.14 ± 28.29  | 90.26 ± 26.25   | 0.0003  | >0.9999 | 0.0003  | 0.0210  |
| PCT (ng/L)                        | 21.12 ± 32.74   | 2.71 ± 4.62     | 22.35 ± 35.86   | 35.85 ± 36.92   | <0.0001 | 0.0281  | <0.0001 | 0.2447  |
| CRP (mg/L)                        | 81.02 ± 78.02   | 89.37 ± 70.34   | 48.93 ± 65.90   | 92.68 ± 88.91   | 0.0396  | 0.0485  | >0.9999 | 0.0994  |
| hsCRP (mg/L)                      | 88.95 ± 83.63   | 106.52 ± 76.45  | 57.91 ± 93.35   | 91.02 ± 80.73   | 0.0124  | 0.0098  | >0.9999 | 0.1150  |
| APTT (S)                          | 50.41 ± 14.54   | 43.94 ± 8.94    | 53.60 ± 18.21   | 55.20 ± 14.54   | 0.0006  | 0.0432  | 0.0006  | >0.9999 |
| PT (S)                            | 17.73 ± 5.12    | 14.64 ± 1.59    | 18.32 ± 5.45    | 20.61 ± 5.62    | <0.0001 | 0.0011  | <0.0001 | 0.2702  |
| FIB (g/L)                         | 3.79 ± 2.25     | 5.48 ± 2.03     | 2.63 ± 1.78     | 2.76 ± 1.59     | <0.0001 | <0.0001 | <0.0001 | >0.9999 |
| ALT (U/L)                         | 99.22 ± 329.72  | 22.05 ± 18.13   | 31.14 ± 27.79   | 227.24 ± 524.96 | 0.0004  | >0.9999 | 0.0005  | 0.0158  |
| AST (U/L)                         | 103.06 ± 146.28 | 37.05 ± 23.21   | 87.09 ± 79.47   | 185.24 ± 207.45 | 0.0021  | 0.0515  | 0.0025  | >0.9999 |
| LDH (U/L)                         | 566.17 ± 703.68 | 256.43 ± 166.42 | 644.41 ± 644.76 | 861.30 ± 948.26 | <0.0001 | 0.0006  | <0.0001 | >0.9999 |
| ALB (g/L)                         | 33.76 ± 7.41    | 37.59 ± 6.06    | 31.04 ± 5.24    | 31.36 ± 8.27    | 0.0001  | 0.0016  | 0.0006  | 0.9838  |
| LAC (mmol/L)                      | 3.00 ± 2.88     | 2.45 ± 1.42     | 2.11 ± 1.33     | 4.11 ± 4.11     | 0.221   | -       | -       | -       |
| D-dimer (mg/L)                    | 6.94 ± 6.09     | 1.11 ± 0.84     | 7.14 ± 4.55     | 8.52 ± 6.33     | 0.0007  | 0.0218  | 0.0005  | >0.9999 |
| Severity of disease               |                 |                 |                 |                 |         |         |         |         |
| APACHE IV score                   | 89.69 ± 34.62   | 59.29 ± 20.79   | 114.18 ± 33.40  | 105.15 ± 22.04  | <0.0001 | <0.0001 | <0.0001 | >0.9999 |
| Hospital mortality                | 35.55 ± 28.07   | 10.74 ± 10.20   | 58.66 ± 28.31   | 46.13 ± 20.18   | <0.0001 | <0.0001 | <0.0001 | 0.8134  |

| assessment (%)                |         |       |          |          |         |         |         |         |
|-------------------------------|---------|-------|----------|----------|---------|---------|---------|---------|
| Hospital mortality,<br>n (%)  | 20 (22) | 0 (0) | 3 (14)   | 17 (50)  | <0.0001 | 0.0431  | <0.0001 | 0.0145  |
| Mechanical<br>ventilation (%) | 57 (61) | 1 (3) | 22 (100) | 34 (100) | <0.0001 | <0.0001 | <0.0001 | >0.9999 |

24 Data are expressed as n/N (%) or mean  $\pm$  SD unless otherwise stated. For variables  
25 with overall p values greater than 0.05, we did not perform group comparisons.  
26 Categorical variables were analyzed using Chi-square test or Fisher's exact test.  
27 One-way ANOVA and Tukey's multiple comparisons test for RBC and ALB.  
28 Kruskal-Wallis test and Dunn's multiple comparisons test for WBC, N, L, HGB, ALT,  
29 AST, LDH, LAC, D-dimer and APACHE IV score. WBC, white blood cell; PMNs,  
30 polymorphonuclear neutrophils; N%, PMN to white blood cell ratio; L%, lymphocyte  
31 to white blood cell ratio; RBC, red blood cell; HGB, hemoglobin; PCT, procalcitonin;  
32 CRP, C-reactive protein; hsCRP, high-sensitivity C-reactive protein; APTT, activated  
33 partial thromboplastin time; PT, prothrombin time; FIB, fibrinogen; ALT, alanine  
34 transaminase; AST; aspartate aminotransferase; LDH, lactic dehydrogenase; ALB,  
35 albumin; LAC, lactate; APACHE, acute physiology and chronic health evaluation.

36 **Supplementary Table 2: The platelet parameters of HS, sepsis, severe sepsis and**  
 37 **septic shock patients**

| Variable                    | HS<br>(n = 75)    | Sepsis<br>(n = 37) | Severe<br>sepsis   | Septic<br>shock  | P value |                  |                            |                           |                                   |                                  |                                         |
|-----------------------------|-------------------|--------------------|--------------------|------------------|---------|------------------|----------------------------|---------------------------|-----------------------------------|----------------------------------|-----------------------------------------|
|                             |                   |                    |                    |                  | Overall | Sepsis<br>vs. HS | Severe<br>sepsis<br>vs. HS | Septic<br>shock<br>vs. HS | Severe<br>sepsis<br>vs.<br>Sepsis | Septic<br>shock<br>vs.<br>Sepsis | Septic<br>shock vs.<br>Severe<br>sepsis |
| PLT<br>(10 <sup>9</sup> /L) | 292.08 ±<br>53.78 | 358.68±<br>113.35  | 171.32 ±<br>105.35 | 72.26 ±<br>58.25 | <0.0001 | 0.0477           | 0.001                      | <0.0001                   | <0.0001                           | <0.0001                          | 0.0798                                  |
| MPV<br>(fL)                 | 10.04 ±<br>0.78   | 9.97 ± 1.06        | 11.19 ±<br>1.24    | 11.15 ±<br>1.25  | <0.0001 | >0.9999          | 0.0014                     | 0.0001                    | 0.0012                            | 0.0001                           | >0.9999                                 |
| PDW<br>(fL)                 | 11.13 ±<br>1.66   | 10.79 ± 2.15       | 14.19 ±<br>3.79    | 13.26 ±<br>3.39  | <0.0001 | 0.6901           | 0.0029                     | 0.0111                    | <0.0001                           | 0.0003                           | >0.9999                                 |
| P-LCR<br>(%)                | 24.55 ±<br>5.76   | 23.88 ± 8.43       | 33.10 ±<br>9.81    | 33.68 ±<br>9.65  | <0.0001 | >0.9999          | 0.0046                     | <0.0001                   | 0.0017                            | <0.0001                          | >0.9999                                 |

38 Data are expressed as mean ± SD. For variables with overall p values greater than  
 39 0.05, we did not perform group comparisons. Kruskal-Wallis test and Dunn's multiple  
 40 comparisons test for PLT, MPV, PDW, P-LCR. PLT, platelet; MPV, mean platelet  
 41 volume, PDW, platelet distribution width; P-LCR, platelet large cell ratio.

42 **Supplementary Table 3: The parameters of platelets from platelet-specific *Gsdmd***  
 43 **KO mice and *Gsdmd*<sup>fl/fl</sup> mice**

|                                          | Platelet-specific <i>Gsdmd</i><br>KO mice | <i>Gsdmd</i> <sup>fl/fl</sup> mice | P value |
|------------------------------------------|-------------------------------------------|------------------------------------|---------|
| Platelet count (10 <sup>9</sup> /L)      | 933.60 ± 83.74                            | 973.20 ± 140.92                    | 0.6038  |
| Mean platelet volume<br>(MPV, fL)        | 6.34 ± 0.05                               | 6.40 ± 0.19                        | 0.6587  |
| Platelet distribution width<br>(PDW, fL) | 5.38 ± 0.04                               | 5.48 ± 0.08                        | 0.119   |
| Platelet large cell ratio<br>(P-LCR, %)  | 2.20 ± 0.64                               | 2.72 ± 1.06                        | 0.375   |

44 Platelet parameters were compared between platelet-specific *Gsdmd* KO mice and  
 45 *Gsdmd*<sup>fl/fl</sup> mice. The morphological parameters: Platelet count, mean platelet volume,  
 46 platelet distribution width, and platelet large cell ratio were compared in  
 47 platelet-specific *Gsdmd* KO mice and *Gsdmd*<sup>fl/fl</sup> mice (n = 5) (mean ± SD). Unpaired t  
 48 test with two-tailed for platelet count and P-LCR. Mann Whitney test with two-tailed  
 49 for MPV and PDW. P value of 0.05 or less was considered statistically significant.  
 50 Abbreviation is as follow: GSDMD, Gasdermin D; KO, knockout; MPV, high mean  
 51 platelet volume, PDW, high platelet distribution width; P-LCR, high platelet large cell  
 52 ratio.

53

54 **Supplementary Table 4: The parameters of platelets from *Tlr4*<sup>-/-</sup> mice and WT**  
 55 **mice**

|                                          | <i>Tlr4</i> <sup>-/-</sup> mice | WT mice        | P value |
|------------------------------------------|---------------------------------|----------------|---------|
| Platelet count (10 <sup>9</sup> /L)      | 978.80 ± 145.55                 | 938.80 ± 35.54 | 0.567   |
| Mean platelet volume<br>(MPV, fL)        | 6.44 ± 0.17                     | 6.48 ± 0.08    | 0.6454  |
| Platelet distribution width<br>(PDW, fL) | 5.60 ± 0.22                     | 5.78 ± 0.18    | 0.1975  |
| Platelet large cell ratio<br>(P-LCR, %)  | 2.34 ± 0.96                     | 2.04 ± 0.95    | 0.6334  |

56 Platelet parameters were compared between *Tlr4*<sup>-/-</sup> mice and WT mice. The  
 57 morphological parameters: Platelet count, mean platelet volume, platelet distribution  
 58 width, and platelet large cell ratio were compared in *Tlr4*<sup>-/-</sup> mice and WT mice (n = 5)  
 59 (mean ± SD). Unpaired t test with two-tailed for platelet count, MPV, PDW and  
 60 P-LCR. P value of 0.05 or less was considered statistically significant. Abbreviation is  
 61 as follow: TLR4, toll-like receptor 4; WT, wild type; MPV, high mean platelet volume,  
 62 PDW, high platelet distribution width; P-LCR, high platelet large cell ratio.



63 **Supplementary Table 5: Age specific vital signs and laboratory variables in**  
 64 **pediatric sepsis**

| <b>Age group</b> | <b>Temperature<br/>(°C)</b> | <b>WBC<br/>(×10<sup>9</sup>/L)</b> | <b>Heart rate<br/>(beats/minute)</b> | <b>Respirat<br/>ory rate<br/>(breaths/<br/>minute)</b> | <b>Systolic<br/>blood<br/>pressure<br/>(mmHg)</b> |
|------------------|-----------------------------|------------------------------------|--------------------------------------|--------------------------------------------------------|---------------------------------------------------|
| 0 days~1 week    | < 36 or > 38.5              | > 34                               | > 180 or < 100                       | > 50                                                   | < 65                                              |
| 1 week~1 month   | < 36 or > 38.5              | > 19.5 or < 6                      | > 180 or < 100                       | > 40                                                   | < 75                                              |
| 1 month~1 year   | < 36 or > 38.5              | > 17.5 or < 6                      | > 180 or < 90                        | > 34                                                   | < 100                                             |
| 1~5 years        | < 36 or > 38.5              | > 15.5 or < 6                      | > 140                                | > 22                                                   | < 4                                               |
| 5~12 years       | < 36 or > 38.5              | > 13.5 or < 4.5                    | > 130                                | > 18                                                   | < 104                                             |
| 12~18 years      | < 36 or > 38.5              | > 11 or < 4.5                      | > 110                                | > 14                                                   | < 117                                             |

65

## Extended Data Figure Legends

66

67

68 **Extended Data Fig.1: Identified purity of platelet, representative proteins related**  
69 **to different cell death signal pathways and platelet pyroptosis in sepsis.**

70 **a**, Purified platelets were obtained from human. Purity of platelet preparation was  
71 determined by FACS analysis using FITC anti-human CD41a and PE anti-human  
72 CD45 (n = 3). **b**, Heatmap of representative proteins expression related to different  
73 cell deaths signal pathways in purified platelet samples from HS (n = 3) and severe  
74 sepsis (with or without septic shock) (n = 3) using high-throughput proteomics  
75 analysis. **c**, Bar graphs displaying the percentage of activations of caspase 1 in  
76 platelets from sepsis and severe sepsis (with or without septic shock) and HS using  
77 FACS (HS: n = 13, Sepsis: n = 10, Severe sepsis with or without septic shock: n = 13).  
78 Data was presented as mean  $\pm$  SD. Kruskal-Wallis test and Dunn's multiple  
79 comparisons test for **c**. HS, healthy subjects; Severe sepsis, severe sepsis/septic shock;  
80 PLTs, platelets.

81

82 **Extended Data Fig.2: TEM images of platelets induced by apoptosis, autophagy**  
83 **or pyroptosis agonists and apoptosis in severe sepsis patients.**

84 **a**, Platelets were induced to apoptosis (10  $\mu$ M ABT-737 induces apoptosis), autophagy  
85 (10  $\mu$ M FCCP induces autophagy) and pyroptosis (10  $\mu$ g/ml LPS and 5  $\mu$ M Nigericin  
86 induces pyroptosis). TEM imaging of different states in platelets. **b**, Representative  
87 lower and higher power TEM field demonstrating loss of platelet ultrastructure in  
88 severe sepsis (with or without septic shock) patients (n = 5), with reduced  
89 granules/organelles and increased vacuolation. Apoptosis, red arrowheads indicate  
90 shrinkage of cell membrane and apoptotic bodies in apoptosis of platelet. Scale bars: 1  
91  $\mu$ m and 500 nm. Severe sepsis, severe sepsis/septic shock; PLTs, platelets.

92

93 **Extended Data Fig.3: The expression and localization of NLRP3 and ASC in**  
94 **severe sepsis platelets or rhS100A8/A9-induced platelets.**

95 **a, b**, Immunofluorescence analysis showing the co-localization of CD41 (green), ASC  
96 (red) and NLRP3 (blue) in platelets from severe sepsis (with or without septic shock)  
97 patients (**a**) (n = 8); and platelets treated with 1  $\mu$ g/ml rhS100A8/A9 or 10  $\mu$ M  
98 Paquinimod (**b**) (n = 6); purple indicates overlap. Scale bars: 5  $\mu$ m and 1  $\mu$ m. HS,

99 healthy subjects; Severe sepsis, severe sepsis/septic shock; NLRP3, NOD-like  
100 receptors containing domain pyrin 3 inflammasome; ASC,  
101 adaptor-apoptosis-associated speck-like protein; Paq, Paquinimod.

102

103 **Extended Data Fig.4: The identification and classic functions of platelets from**  
104 **platelet-specific *Gsdmd* KO mice.**

105 **a, b,** The *Gsdmd*<sup>fl/fl</sup> PF4-Cre mice were identified by PCR (**a**) and confirmed by  
106 western blot (**b**), respectively (n = 6). **c,** The platelet (isolated from mice) suspensions  
107 were incubated with 0.1 U/ml thrombin for 30 minutes. P selectin translocation to  
108 membrane was assessed by FACS after stimulation with thrombin. The representative  
109 plots were presented as the number of counts over the log of associated fluorescence  
110 (baseline refers to the group without thrombin). Quantification of data presented as  
111 percentage of platelet activation. Data are expressed as mean ± SD (*Gsdmd*<sup>fl/fl</sup>+HBSS,  
112 n = 5; *Gsdmd*<sup>fl/fl</sup>+Thrombin, n = 6; *Gsdmd*<sup>fl/fl</sup> PF4-Cre+Thrombin, n = 4). **d,** Tail  
113 bleeding times of mouse was measured with the tail dipped into warmed saline to  
114 assess haemostasis using a tail-guillotine. Data are expressed as mean ± SD  
115 (*Gsdmd*<sup>fl/fl</sup> mice, n = 7; *Gsdmd*<sup>fl/fl</sup> PF4-Cre mice, n = 6). One-way ANOVA and  
116 Tukey's multiple comparisons test for **c**. Unpaired t test with two-tailed for **d**. MT,  
117 mutation; WT, wild type; Tg, transgene; Ctrl, control; GSDMD, Gasdermin D; PLTs,  
118 platelets; HBSS, hank's balanced salt solution.

119

120 **Extended Data Fig.5: The levels of S100A8/A9 in sepsis patients/mice and the**  
121 **caspase 1 activity in platelets from the CLP or rmS100A8/A9-injected mice.**

122 **a-c,** Boxplots displaying the level of heterodimer S100A8/A9 in plasma from (**a**)  
123 severe sepsis (with or without septic shock) patients (HS: n = 53, Severe sepsis: n =  
124 51), (**b**) CLP-induced sepsis mice (Sham, n = 10, CLP: n = 20) and (**c**) LPS-induced  
125 sepsis mice (PBS, n = 8, LPS: n = 8) by ELISA. The boxes indicate the 25% quantile,  
126 median, and 75% quantile. **d,** In a mouse model, mice that were injected  
127 intravenously with rmS100A8/A9 (30 µg/kg) or normal saline (n = 4 mouse/group)  
128 for 6 hours. Another mouse model, mice were induced CLP for 6 hours. FACS  
129 analysis displaying the caspase 1 activity in platelets. Mann Whitney test with  
130 two-tailed for **a-b**. Unpaired t test with two-tailed for **c**. One-way ANOVA and  
131 Tukey's multiple comparisons test for **d**. Data was presented as mean ± SD. HS,  
132 healthy subjects; Severe sepsis, severe sepsis/septic shock; Sham, sham-operated mice;  
133 CLP, CLP-induced sepsis mice; PBS, PBS-injected mice; LPS, LPS-injected mice.

134

135 **Extended Data Fig.6: Putative receptors for S100A8/A9-induced platelet**  
136 **pyroptosis.**

137 The platelet (isolated from HS) suspensions were incubated in the presence of  
138 neutralizing monoclonal antibodies (20 µg/ml) against control IgG, CD36, RAGE, or

139 TLR4, and then treated with 1 µg/ml rmS100A8/A9 for 4 hours. **a**, FACS analysis  
140 displaying the caspase 1 activity in human platelets after stimulation. The quantified  
141 results are shown on the below. **b**, P selectin translocation to membrane (CD62P) was  
142 assessed by flow cytometry after stimulation. The quantified results are shown on the  
143 below. Data was presented as mean ± SD, n = 4. One-way ANOVA and Tukey's  
144 multiple comparisons test for **a**, **b**. HS, healthy subjects; TLR4, toll-like receptor 4;  
145 RAGE, advanced glycation end products.

146

147 **Extended Data Fig.7: NLRP3 inflammasome and caspase 1 activity of platelets in**  
148 **mice transfused with *Tlr4*<sup>-/-</sup> or WT platelets.**

149 **a**, *In vitro*, FACS analysis displaying the caspase 1 activity in platelets (*Tlr4*<sup>-/-</sup> or WT)  
150 treated with 1 µg/ml rmS100A8/A9 for 4 hours (n = 5). The quantified results are  
151 shown on the right. **b-f**, *In vivo*, a total of 1.2 x 10<sup>7</sup> purified platelets (volume: 200 µl,  
152 concentration: 6 x 10<sup>10</sup> platelets/L) from *Tlr4*<sup>-/-</sup> or WT mice were intravenously  
153 transfused to mT/mG: PF4-Cre mouse. **(b)** After platelet depletion, platelet counts in  
154 mice were assessed at 0, 2, 4, 6, 8, 24 and 26 hours using a hematology analyzer (n =  
155 3). **(c)** Platelet counts in mice before and after transfused with WT or *Tlr4*<sup>-/-</sup> platelets  
156 were detected at 0, 0.5, 2, 4 and 6 hours using a hematology analyzer (n = 3). **(d)** The  
157 percentages of transfused *Tlr4*<sup>-/-</sup> platelets in total platelets of mice were detected at 0,  
158 0.5, 2, 4 and 6 hours using FACS analysis (n = 3). **(e)** Caspase 1 activity was  
159 measured using FACS analysis (n = 6). **(f)** The association of ASC and NLRP3  
160 inflammasome in murine platelets was measured by immunofluorescence analysis.  
161 Platelets were stained for CD41 (green), ASC (red) and NLRP3 (blue); scale bars: 5  
162 µm and 1 µm; n = 6. Data was presented as mean ± SD. One-way ANOVA and  
163 Tukey's multiple comparisons test for **a**. Two-way ANOVA test for **c**, **d**. Abbreviation  
164 is as follow: HBSS, hank's balanced salt solution; Saline, mice transfused with normal  
165 saline; WT PLTs, LPS-injected mice transfused with WT platelets; *Tlr4*<sup>-/-</sup> PLTs,  
166 LPS-injected mice transfused with *Tlr4*<sup>-/-</sup> platelets. PBS, PBS-injected mice;  
167 LPS+saline, LPS-injected mice transfused with normal saline; LPS+WT PLTs,  
168 LPS-injected mice transfused with WT platelets; LPS+*Tlr4*<sup>-/-</sup> PLTs, LPS-injected mice  
169 transfused with *Tlr4*<sup>-/-</sup> platelets; LPS, lipopolysaccharide; NLRP3, NOD-like  
170 receptors containing domain pyrin 3 inflammasome; ASC,  
171 adaptor-apoptosis-associated speck-like protein.

172

173 **Extended Data Fig.8: The function of mitochondria in septic platelets and**  
174 **S100A8/A9-induced platelets.**

175 **a**, In platelets from severe sepsis (with or without septic shock) patients, bar graphs  
176 displaying change of mitochondrial membrane potential ( $\Delta\Psi_m$ ) by staining with 40  
177 nM TMRM using FACS analysis (HS: n = 20, Severe sepsis: n = 25). **b**, **c**, *In vitro*,  
178 bar graphs displaying change of mitochondrial  $\Delta\Psi_m$  **(b)** and ROS production **(c)** in  
179 platelets (*Tlr4*<sup>-/-</sup> or WT) treated with 1 µg/ml rmS100A8/A9 for 4 hours using FACS

180 analysis (n = 5). **d, e**, In the LPS induced murine model, mice with platelets depletion  
181 were transfused with a total of  $1.2 \times 10^7$  purified platelets (volume: 200  $\mu$ l,  
182 concentration:  $6 \times 10^{10}$  platelets/L) from *Tlr4*<sup>-/-</sup> or WT mice (n = 6/group). After 6  
183 hours, bar graphs displaying change of mitochondrial  $\Delta\Psi_m$  (**d**) and ROS production (**e**)  
184 in platelets (*Tlr4*<sup>-/-</sup> or WT) using FACS analysis (n = 6). Data was presented as mean  
185 fluorescence  $\pm$  SD. Unpaired t test with two-tailed for **a**. One-way ANOVA and  
186 Tukey's multiple comparisons test for **b-e**. Abbreviation is as follow: HS, healthy  
187 subjects; Severe sepsis, severe sepsis/septic shock; HBSS, hank's balanced salt  
188 Solution. PBS, PBS-injected mice; LPS+saline, LPS-injected mice transfused with  
189 normal saline; LPS+WT PLTs, LPS-injected mice transfused with WT platelets;  
190 LPS+*Tlr4*<sup>-/-</sup> PLTs, LPS-injected mice transfused with *Tlr4*<sup>-/-</sup> platelets; TMRM,  
191 tetramethylrhodamine methyl ester; ROS, reactive oxygen species.

192

193 **Extended Data Fig.9: The formation of NET with different treatments and the**  
194 **release of ox-mtDNA from S100A8/A9-induced platelets after MitoTempo**  
195 **treatment.**

196 **a**, Representative immunofluorescence of platelets treated with rhS100A8/A9 alone or  
197 supernatants of rhS100A8/A9-induced platelets for 4 hours. Cells were stained with  
198 Hoechst for DNA (blue), anti-citrullinated H3 for PMNs or NETs (cyan); scale bars: 5  
199  $\mu$ m; n = 4. **b-c**, PMNs isolated from HS were incubated with PBS, 50 nM PMA, and  
200 resting platelets, 0.1 U/ml thrombin activated platelets or 1  $\mu$ g/ml  
201 S100A8/A9-induced platelets for 4 hours. Representative immunofluorescence of  
202 NET formation treated with PMA, resting platelets, thrombin or S100A8/A9-induced  
203 platelets (**b**). Cells were stained with Hoechst for DNA (blue), anti-citrullinated H3  
204 for PMNs or NETs (green), CD41 for platelet (red). (**c**) Quantification of MPO-DNA  
205 and dsDNA in the supernatant of NET formation using PicoGreen fluorescent dye and  
206 MPO-DNA-ELISA, respectively (n = 6). **d-e**, Purified platelets suspensions were  
207 treated with rhS100A8/A9 (1  $\mu$ g/ml) and MitoTempo (5 mM) for 4 hours, and then 50  
208 nM PMA, S100A8/A9-induced platelets or MitoTempo-S100A8/A9-induced platelets  
209 induced NET formation. (**d**) The levels of ox-mtDNA in supernatant of  
210 S100A8/A9-induced platelets were determined by General 8-OHdG ELISA Kit (n =  
211 4). (**e**) Quantification of MPO-DNA and dsDNA (NETosis) in the supernatant of cells  
212 using PicoGreen fluorescent dye and MPO-DNA-ELISA, respectively (n = 3). Data  
213 was presented as mean  $\pm$  SD. One-way ANOVA and Tukey's multiple comparisons  
214 test for **c-e**. Abbreviation is as follow: HS, healthy subjects; PLTs, platelets; PMNs,  
215 polymorphonuclear neutrophils; PMA, phorbol myristate acetate; MPO,  
216 myeloperoxidase; dsDNA, double-stranded DNA; NET, neutrophil extracellular trap;  
217 ox-mtDNA, oxidized mitochondrial DNA.

218

219 **Extended Data Fig.10: Immunofluorescence of pyroptotic platelets in NETs and**  
220 **the change of platelet counts in *Gsdmd*<sup>fl/fl</sup> PF4-Cre mice by CLP.**

221 **a**, PMNs (*S100a9*<sup>-/-</sup> or WT) were incubated with 50 nM PMA to induced NET

222 formation for 4 hours, and then incubated with platelets for another 4 hours.  
223 Representative immunofluorescence of PMNs incubated with platelets. Cells were  
224 stained with Hoechst for DNA (blue), anti-MPO for PMNs or NETs (cyan), CD41 for  
225 platelet (red) and activated caspase 1 for pyroptosis (green); scale bars: 25  $\mu\text{m}$  and 5  
226  $\mu\text{m}$ . **b**, In the CLP-induced sepsis model, platelet counts in *Gsdmd*<sup>fl/fl</sup> PF4-Cre mice  
227 and littermate control *Gsdmd*<sup>fl/fl</sup> mice were assessed at 0, 2, 4, and 6 hours using a  
228 hematology analyzer (n = 5). Data was presented as mean  $\pm$  SD. Two-way ANOVA  
229 and Tukey's multiple comparisons test for b. Abbreviation is as follow: PLT, platelet;  
230 PMNs, polymorphonuclear neutrophils; PMA, phorbol myristate acetate; MPO,  
231 myeloperoxidase; Sham, sham-operated mice; CLP, CLP-induced sepsis mice;  
232 GSDMD, Gasdermin D.
